# Supplementary material
Source: MDPI journal article supplement (https://www.mdpi.com/2073-4441/14/2/213)
Supplement: s1 [file s1]

## Supplementary Material

**Table S1.** 90 kinds of hyperparameter combination.

| Training No. | $In$                         | $Back_{ts}$ | $Hid$ | $Drp$ | $Drp_r$ | P <sub>5</sub> of NSE |
|--------------|------------------------------|-------------|-------|-------|---------|-----------------------|
| 1            | $Q_{shio} + Q_{san}$         | 24          | 20    | 0     | 0       | 0.896323              |
| 2            | $Q_{shio} + P$               | 24          | 20    | 0     | 0       | 0.612851              |
| 3            | $Q_{shio} + Q_{san} + P$     | 24          | 20    | 0     | 0       | 0.859700              |
| 4            | $Q_{shio} + Q_{san} + P + T$ | 24          | 20    | 0     | 0       | 0.841739              |
| 5            | $Q_{shio}$                   | 24          | 20    | 0     | 0       | 0.643958              |
| 6            | $Q_{shio} + T$               | 24          | 20    | 0     | 0       | 0.351267              |
| 7            | $Q_{shio} + Q_{san} + P$     | 24          | 20    | 0.01  | 0.01    | 0.860271              |
| 8            | $Q_{shio} + Q_{san} + P$     | 24          | 20    | 0.05  | 0.05    | 0.824750              |
| 9            | $Q_{shio} + Q_{san} + P$     | 24          | 20    | 0.1   | 0.1     | 0.771259              |
| 10           | $Q_{shio} + Q_{san}$         | 24          | 50    | 0     | 0       | 0.930278              |
| 11           | $Q_{shio} + P$               | 24          | 50    | 0     | 0       | 0.573846              |
| 12           | $Q_{shio} + Q_{san} + P$     | 24          | 50    | 0     | 0       | 0.936166              |
| 13           | $Q_{shio} + Q_{san} + P + T$ | 24          | 50    | 0     | 0       | 0.892641              |
| 14           | $Q_{shio}$                   | 24          | 50    | 0     | 0       | 0.680160              |
| 15           | $Q_{shio} + T$               | 24          | 50    | 0     | 0       | 0.356994              |
| 16           | $Q_{shio} + Q_{san} + P$     | 24          | 50    | 0.01  | 0.01    | 0.927786              |
| 17           | $Q_{shio} + Q_{san} + P$     | 24          | 50    | 0.05  | 0.05    | 0.908147              |
| 18           | $Q_{shio} + Q_{san} + P$     | 24          | 50    | 0.1   | 0.1     | 0.873763              |
| 19           | $Q_{shio} + Q_{san}$         | 24          | 100   | 0     | 0       | 0.947078              |
| 20           | $Q_{shio} + P$               | 24          | 100   | 0     | 0       | 0.535739              |
| 21           | $Q_{shio} + Q_{san} + P$     | 24          | 100   | 0     | 0       | 0.957068              |
| 22           | $Q_{shio} + Q_{san} + P + T$ | 24          | 100   | 0     | 0       | 0.906750              |
| 23           | $Q_{shio}$                   | 24          | 100   | 0     | 0       | 0.727970              |
| 24           | $Q_{shio} + T$               | 24          | 100   | 0     | 0       | 0.359394              |
| 25           | $Q_{shio} + Q_{san} + P$     | 24          | 100   | 0.01  | 0.01    | 0.943825              |
| 26           | $Q_{shio} + Q_{san} + P$     | 24          | 100   | 0.05  | 0.05    | 0.922461              |
| 27           | $Q_{shio} + Q_{san} + P$     | 24          | 100   | 0.1   | 0.1     | 0.909169              |
| 28           | $Q_{shio} + Q_{san}$         | 24          | 200   | 0     | 0       | 0.947493              |
| 29           | $Q_{shio} + P$               | 24          | 200   | 0     | 0       | 0.601911              |
| 30           | $Q_{shio} + Q_{san} + P$     | 24          | 200   | 0     | 0       | 0.959165              |
| 31           | $Q_{shio} + Q_{san} + P + T$ | 24          | 200   | 0     | 0       | 0.925806              |
| 32           | $Q_{shio}$                   | 24          | 200   | 0     | 0       | 0.702479              |
| 33           | $Q_{shio} + T$               | 24          | 200   | 0     | 0       | 0.385552              |
| 34           | $Q_{shio} + Q_{san} + P$     | 24          | 200   | 0.01  | 0.01    | 0.961166              |
| 35           | $Q_{shio} + Q_{san} + P$     | 24          | 200   | 0.05  | 0.05    | 0.953193              |
| 36           | $Q_{shio} + Q_{san} + P$     | 24          | 200   | 0.1   | 0.1     | 0.928058              |
| 37           | $Q_{shio} + Q_{san}$         | 168         | 20    | 0     | 0       | 0.904154              |
| 38           | $Q_{shio} + P$               | 168         | 20    | 0     | 0       | 0.499526              |

|    |                              |      |     |      |      |           |
|----|------------------------------|------|-----|------|------|-----------|
| 39 | $Q_{shio} + Q_{san} + P$     | 168  | 20  | 0    | 0    | 0.900507  |
| 40 | $Q_{shio} + Q_{san} + P + T$ | 168  | 20  | 0    | 0    | 0.869109  |
| 41 | $Q_{shio}$                   | 168  | 20  | 0    | 0    | 0.129549  |
| 42 | $Q_{shio} + T$               | 168  | 20  | 0    | 0    | 0.122250  |
| 43 | $Q_{shio} + Q_{san}$         | 168  | 50  | 0    | 0    | 0.920067  |
| 44 | $Q_{shio} + P$               | 168  | 50  | 0    | 0    | 0.494320  |
| 45 | $Q_{shio} + Q_{san} + P$     | 168  | 50  | 0    | 0    | 0.915458  |
| 46 | $Q_{shio} + Q_{san} + P + T$ | 168  | 50  | 0    | 0    | 0.872925  |
| 47 | $Q_{shio}$                   | 168  | 50  | 0    | 0    | 0.138257  |
| 48 | $Q_{shio} + T$               | 168  | 50  | 0    | 0    | 0.133258  |
| 49 | $Q_{shio} + Q_{san}$         | 168  | 50  | 0.01 | 0.01 | 0.918030  |
| 50 | $Q_{shio} + Q_{san} + P$     | 168  | 50  | 0.01 | 0.01 | 0.914554  |
| 51 | $Q_{shio} + Q_{san}$         | 168  | 50  | 0.05 | 0.05 | 0.900544  |
| 52 | $Q_{shio} + Q_{san}$         | 168  | 50  | 0.1  | 0.1  | 0.874470  |
| 53 | $Q_{shio} + Q_{san}$         | 168  | 100 | 0    | 0    | 0.922857  |
| 54 | $Q_{shio} + P$               | 168  | 100 | 0    | 0    | 0.446777  |
| 55 | $Q_{shio} + Q_{san} + P$     | 168  | 100 | 0    | 0    | 0.898342  |
| 56 | $Q_{shio} + Q_{san} + P + T$ | 168  | 100 | 0    | 0    | 0.871731  |
| 57 | $Q_{shio}$                   | 168  | 100 | 0    | 0    | 0.146017  |
| 58 | $Q_{shio} + T$               | 168  | 100 | 0    | 0    | 0.165140  |
| 59 | $Q_{shio} + Q_{san} + P$     | 168  | 100 | 0.01 | 0.01 | 0.906672  |
| 60 | $Q_{shio} + Q_{san} + P$     | 168  | 100 | 0.05 | 0.05 | 0.904354  |
| 61 | $Q_{shio} + Q_{san} + P$     | 168  | 100 | 0.1  | 0.1  | 0.887407  |
| 62 | $Q_{shio} + Q_{san}$         | 168  | 200 | 0    | 0    | 0.927516  |
| 63 | $Q_{shio} + P$               | 168  | 200 | 0    | 0    | 0.459666  |
| 64 | $Q_{shio} + Q_{san} + P$     | 168  | 200 | 0    | 0    | 0.876401  |
| 65 | $Q_{shio} + Q_{san} + P + T$ | 168  | 200 | 0    | 0    | 0.869963  |
| 66 | $Q_{shio}$                   | 168  | 200 | 0    | 0    | 0.146245  |
| 67 | $Q_{shio} + T$               | 168  | 200 | 0    | 0    | 0.182535  |
| 68 | $Q_{shio} + Q_{san} + P$     | 168  | 200 | 0.01 | 0.01 | 0.883799  |
| 69 | $Q_{shio} + Q_{san} + P$     | 168  | 200 | 0.05 | 0.05 | 0.883235  |
| 70 | $Q_{shio} + Q_{san} + P$     | 168  | 200 | 0.1  | 0.1  | 0.881285  |
| 71 | $Q_{san}$                    | None | 20  | 0    | 0    | 0.880953  |
| 72 | $P$                          | None | 20  | 0    | 0    | 0.374783  |
| 73 | $T$                          | None | 20  | 0    | 0    | -0.016940 |
| 74 | $Q_{san} + P$                | None | 20  | 0    | 0    | 0.892470  |
| 75 | $Q_{san} + T$                | None | 20  | 0    | 0    | 0.892694  |
| 76 | $Q_{san}$                    | None | 50  | 0    | 0    | 0.871054  |
| 77 | $P$                          | None | 50  | 0    | 0    | 0.315801  |
| 78 | $T$                          | None | 50  | 0    | 0    | -0.003190 |
| 79 | $Q_{san} + P$                | None | 50  | 0    | 0    | 0.885649  |
| 80 | $Q_{san} + T$                | None | 50  | 0    | 0    | 0.876715  |
| 81 | $Q_{san}$                    | None | 100 | 0    | 0    | 0.888463  |
| 82 | $P$                          | None | 100 | 0    | 0    | 0.310116  |

|    |               |      |     |   |   |          |
|----|---------------|------|-----|---|---|----------|
| 83 | $T$           | None | 100 | 0 | 0 | 0.029295 |
| 84 | $Q_{san} + P$ | None | 100 | 0 | 0 | 0.867375 |
| 85 | $Q_{san} + T$ | None | 100 | 0 | 0 | 0.889015 |
| 86 | $Q_{san}$     | None | 200 | 0 | 0 | 0.909590 |
| 87 | $P$           | None | 200 | 0 | 0 | 0.372668 |
| 88 | $T$           | None | 200 | 0 | 0 | 0.032621 |
| 89 | $Q_{san} + P$ | None | 200 | 0 | 0 | 0.845648 |
| 90 | $Q_{san} + T$ | None | 200 | 0 | 0 | 0.900389 |

---
